# Supplementary material for: Evidence from simulation studies for selective constraints on the codon usage of the Angiosperm psbA gene
Source: PLoS Comput Biol. 2021 Oct 26;17(10):e1009535. doi: 10.1371/journal.pcbi.1009535 (PMC8570520; doi:10.1371/journal.pcbi.1009535)
Supplement: S1 Table — In all cases the RefSeq genome file was downloaded from https://www.ncbi.nlm.nih.gov/genome/browse#!/eukaryotes/. (DOCX) [file pcbi.1009535.s001.docx]

**S1 Table**. List of taxa used in the substitution count analysis. In all cases the RefSeq genome file was downloaded from <https://www.ncbi.nlm.nih.gov/genome/browse#!/eukaryotes/>

| | *Acorus gramineus* | | --- | | *Actinidia kolomikta* | | *Adoxa moschatellina* | | *Akebia quintata* | | *Aletris spicata* | | *Allium cepa* | | *Aloe maculata* | | *Aloysia citrodora* | | *Amaranthus hypochondriacus* | | *Ananas comosus* | | *Anemopaegma chamberlaynii* | | *Annona cherimola* | | *Aquilaria sinensis* | | *Aralia undulata* | | *Areca vestiaria* | | *Asarum minus* | | *Asclepias syriaca* | | *Averrhoa carambola* | | *Barringtonia racemosa* | | *Berberis bealei* | | *Betula cordifolia* | | *Boehmeria umbrosa* | | *Brassica juncea* | | *Burmannia oblonga* | | *Buxus microphylla* | | *Byrsonima crassifolia* | | *Cabomba caroliniana* | | *Calycanthus floridus* | | *Camellia cuspidata* | | *Campanula punctata* | | *Campynema lineare* | | *Carapa guianensis* | | *Carex neurocarpa* | | *Carica papaya* | | *Carludovica palmata* | | *Carnegiea gigantea* | | *Carpodetus serratus* | | *Ceratophyllum demersum* | | *Champereia manillana* | | *Chloranthus japonicus* | | *Chrysanthemum indicum* | | *Chrysobalanus icaco* | | *Circaeaster agrestis* | | *Cistantha longiscapa* | | *Citrus platymamma* | | *Coffea canephora* | | *Colchicum autumnale* | | *Commiphora wightii* | | *Cornus controversa* | | *Corynocarpus laevigatus* | | *Cucurbita maxima* | | *Cuscuta reflexa* | | *Dasypogon bromeliifolius* | | *Davidia involucrata* | | *Dioscorea villosa* | | *Diospyros blancoi* | | *Drimys granadensis* | | *Drosera regia* | | *Echinacanthus lofouensis* | | *Elaeagnus mollis* | | *Erythropalum scandens* | | *Erythroxylum novogranatense* | | *Eucalyptus torquata* | | *Euonymus hamiltonianus* | | *Euphorbia esula* | | *Euptelea pleiosperma* | | *Fagus engleriana* | | *Francoa sonchifolia* | | *Garcinia mangostana* | | *Genlisea filiformis* | | *Gentiana straminea* | | *Geranium palmatum*  *Ginkgo biloba* | | *Habenaria pantlingiana* | | *Hanguana malayana* | | *Heliconia collinsiana* | | *Helwingia himalaica* | | *Hibiscus syriacus* | | *Humulus lupulus* | | *Hydrangea luteovenosa* | | *Illicium oligandrum* | | *Impatiens piufanensis* | | *Iodes cirrhosa* | | *Iris sanguinea* | | *Japonolirion osense* | | *Joinvillea ascendens* | | *Juglans regia* | | *Lagerstroemia speciosa* | | *Lamium galeobdolon* | | *Lancea tibetica* | | *Larrea tridentata* | | *Leitneria floridana* | | *Lilium fargesii* | | *Linum usitatissimum* | | *Liquidambar formasana* | | *Lonicera tragophylla* | | *Luzuriaga radicans* | | *Macadamia ternifolia* | | *Magnolia biondii* | | *Melastoma candidum* | | *Morella rubra* | | *Morus mongolica* | | *Musa itinerans* | | *Najas flexilis* | | *Nelumbo nucifera* | | *Nymphaea mexicana* | | *Oenothera oakesiana* | | *Olea woodiana* | | *Ostericum grosseserratum* | | *Oxyria sinensis* | | *Paeonia obovata* | | *Papaver somniferum* | | *Paris quadrifolia* | | *Parrotia subaequalis* | | *Passiflora edulis* | | *Paulownia tomentosa* | | *Pentaphylax euryoides* | | *Penthorum chinense* | | *Phoebe zhennan*  *Pinus thunbergii* | | *Piper kadsura* | | *Plantago media* | | *Platanus occidentalis* | | *Portulaca oleracea* | | *Potamogeton perfoliatus* | | *Pouteria campechiana* | | *Primula poissonii* | | *Primulina liboensis* | | *Ranunculus macranthus* | | *Ravenala madagascariensis* | | *Rosa roxburghii* | | *Sabia yunnanensis* | | *Sagittaria lichuanensis* | | *Salix magnifica* | | *Sapindus mukorossi* | | *Schoepfia jasminodora* | | *Scrophularia henryi* | | *Sedum sarmentosum* | | *Sesamum indicum* | | *Silene chalcedonica* | | *Sladenia celastrifolia* | | *Solanum cheesmaniae* | | *Stephanis japonica* | | *Styrax grandiflorus* | | *Symplocarpus renifolius* | | *Symplocos ovatilobata* | | *Tapiscia sinensis* | | *Tarenaya hassleriana* | | *Taxillus sutchuenensis* | | *Tetragonia tetragonioides* | | *Tofieldia thibetica* | | *Torricellia angulata* | | *Trithuria inconspicua* | | *Trochodendron aralioides* | | *Typha latifolia* | | *Ulmus macrocarpa* | | *Vaccinium macrocarpon* | | *Viola seoulensis* | | *Viscum coloratum* | | *Vitis mustangensis* | | *Welwitschia mirabilis* | | *Wisteria floribunda* | | *Yucca filamentosa* | | *Zamia furfuracea* | | *Zea luxurians* | | *Zingiber spectabile* | | *Ziziphus jujuba* | | *Zostera marina* | |  |
| --- | --- | --- | --- | --- | --- | --- | --- | --- | --- | --- | --- | --- | --- | --- | --- | --- | --- | --- | --- | --- | --- | --- | --- | --- | --- | --- | --- | --- | --- | --- | --- | --- | --- | --- | --- | --- | --- | --- | --- | --- | --- | --- | --- | --- | --- | --- | --- | --- | --- | --- | --- | --- | --- | --- | --- | --- | --- | --- | --- | --- | --- | --- | --- | --- | --- | --- | --- | --- | --- | --- | --- | --- | --- | --- | --- | --- | --- | --- | --- | --- | --- | --- | --- | --- | --- | --- | --- | --- | --- | --- | --- | --- | --- | --- | --- | --- | --- | --- | --- | --- | --- | --- | --- | --- | --- | --- | --- | --- | --- | --- | --- | --- | --- | --- | --- | --- | --- | --- | --- | --- | --- | --- | --- | --- | --- | --- | --- | --- | --- | --- | --- | --- | --- | --- | --- | --- | --- | --- | --- | --- | --- | --- | --- | --- | --- | --- | --- | --- | --- | --- | --- | --- | --- | --- | --- | --- | --- | --- | --- | --- | --- | --- | --- | --- | --- | --- | --- |
